# Supplementary material
Source: ML conference proceedings conference paper supplement (https://openreview.net/forum?id=CCu6RcUMwK0)
Supplement: supplementary_material [file attachment]

**A**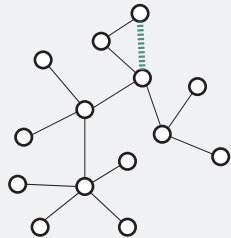**B**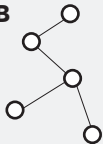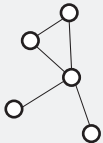

GNN

**C**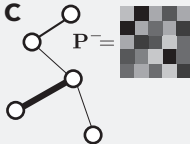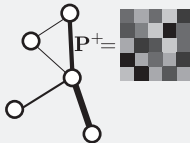

$((P^\pm)^\tau)_{\tau=2}^{\tau_c}$

**D**

WALKPOOL

$$((\text{node}^{\tau,\sigma}, \text{link}^{\tau,\sigma})_{\sigma \in \pm}, \Delta \text{graph}^\tau)_{\tau=2}^{\tau_c}$$
